# Supplementary material for: Comparison between elementary flux modes analysis and 13C-metabolic fluxes measured in bacterial and plant cells
Source: Springer Nature journal article supplement (doi:10.1186/1752-0509-5-95), 2011-06-20

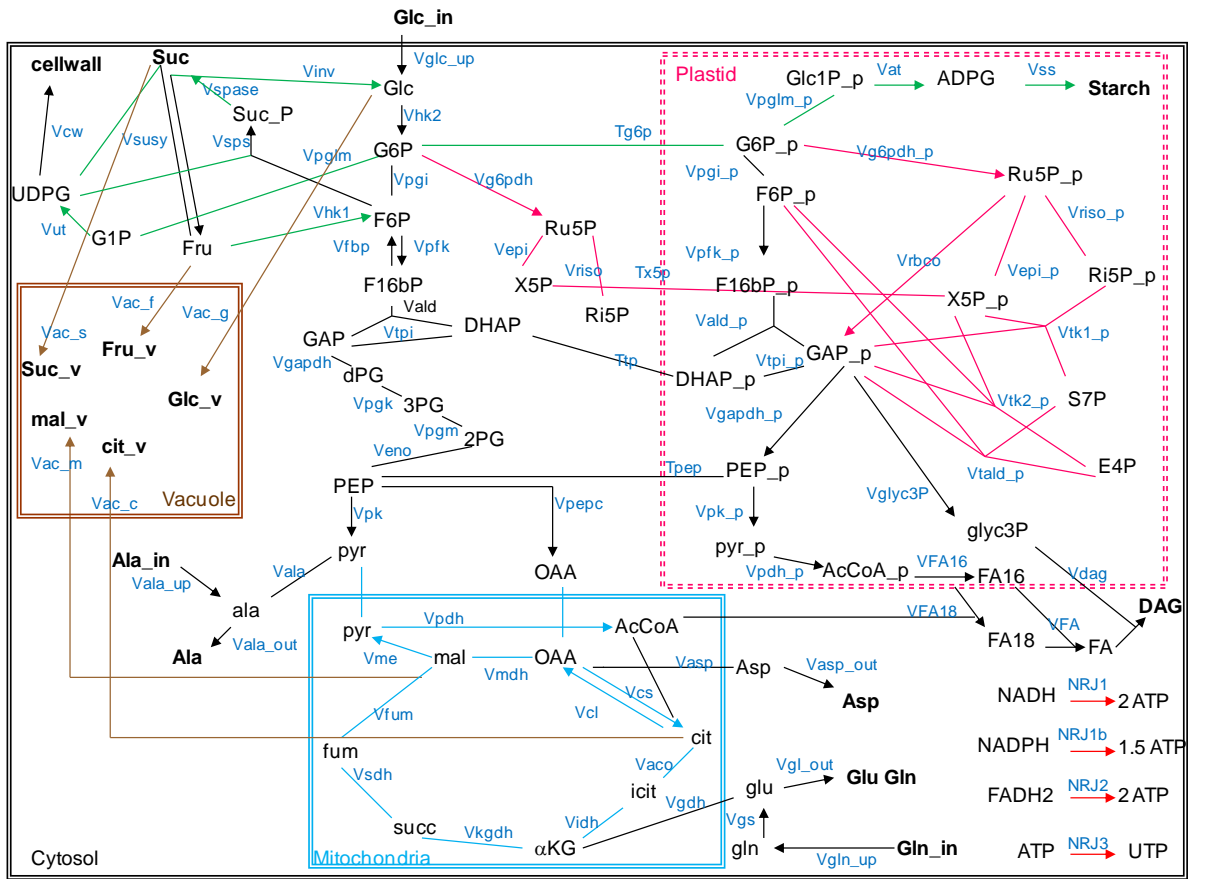

Supplement: 12918_2010_707_MOESM5_ESM.pdf [file 12918_2010_707_MOESM5_ESM.pdf]
